# Supplementary material for: The synergetic effect of N-doped graphene and silver nanowires for high electrocatalytic performance in the oxygen reduction reaction
Source: Royal Society of Chemistry journal article supplement (doi:10.1039/c3ra41214h), 2013-01-01
Supplement: c3ra41214h.pdf [file c3ra41214h.pdf]

## Supplementary Information

### The synergetic effect of N-doped graphene and silver nanowires for high electrocatalytic performance in oxygen reduction reaction

Dongbo Yu,<sup>a,b</sup> Jianfeng Yao,<sup>a</sup> Ling Qiu,<sup>c</sup> Yuzhou Wu,<sup>a</sup> Lunxi Li,<sup>a</sup> Yi Feng,<sup>\*b</sup> Qi Liu,<sup>a</sup> Dan Li,<sup>c</sup> and Huanting Wang<sup>\*a</sup>

<sup>a</sup> Department of Chemical Engineering, Monash University, Clayton, Victoria 3800, Australia

<sup>b</sup> School of Materials Science and Engineering, Hefei University of Technology, Hefei, Anhui 230009, People's Republic of China

<sup>c</sup> Department of Materials Engineering, Monash University, Clayton, Victoria 3800, Australia

E-mail addresses: huanting.wang@ monash.edu (H. Wang); fy123@mail.hf.ah.cn (Y. Feng)

Tel: +61 3 9905 3449; Fax: +61 3 9905 5686

### Experimental details

#### *Preparation of NG/SNWs composites*

SNWs were synthesized by a two-step injection method.<sup>1</sup> Collected by centrifugation and rinsed by ethanol and deionized water for several times, then SNWs were redispersed in ethanol solution at a concentration of 50 mg/mL. Graphene oxide (GO) was prepared from natural graphite flakes by using a modified Hummers' method.<sup>2</sup> To the preparation of NG/SNWs composites, 60  $\mu$ l of SNWs solution (50 mg/ml in ethanol) was placed into 24 ml of GO (0.33 mg/ml) ethanol solution, and then ultrasonicated for more than 3 h to achieve an uniform dispersion, followed by the addition of 0.5 ml of ammonium hydroxide solution (NH<sub>4</sub>OH, 25-28 wt%) and 1.9 ml of deionized water. The mixture was finally transferred to a 40 ml autoclave at 150 °C for 4 h. The pure NG and reduced graphene/Ag nanowires (r-G/SNWs) composites

were prepared through the same steps only without SNWs and  $\text{NH}_4\text{OH}$ , respectively, and the reduced graphene (r-G) was followed the synthesis of NG without the addition of  $\text{NH}_4\text{OH}$ . The final product was collected by freeze-drying after washing with ethanol and deionized water.

### ***Apparatus and Characterization***

Electrochemistry measurements were characterized by cyclic voltammetry (CV) and linear sweep voltammetry (LSV) in 1 M KOH solution by using an Autolab 2 instrument. The KCl saturated Ag/AgCl was used as reference electrode, and graphite rod was used as counter electrode. 2 mg of catalyst, 10 mg of Nafion solution (5%) and 1 ml of 25 % ethanol aqueous solution was mixed and ultrasonicated for 1 h. The resulting mixture was dispersed and yielded  $0.2 \text{ mg/cm}^2$  of catalyst onto  $1 \text{ cm}^2$  of carbon paper (TGPH-030, Toray). The scan rate was set at 20 mV/s. 1 M KOH solution was saturated with  $\text{O}_2$  or  $\text{N}_2$  by bubbling  $\text{O}_2$  or  $\text{N}_2$  gas, and the gas bubbling was kept through the test in order to ensure  $\text{O}_2$  or  $\text{N}_2$  saturation in electrolyte solution. The microstructure of catalysts was investigated by using a scanning electron microscope (SEM, JEOL JSM-7100F) and a transmission electron microscope (TEM, JEM-2100) operated at 200 KV. X-ray photoelectron spectroscopy (XPS) analyses were carried out on a Thermo Fisher X-ray photoelectron spectrometer system (ESCALAB250). The phase structure was examined by X-ray diffraction (XRD) using a BRUKER D8 Advance X-ray diffractometer with  $\text{Cu K}\alpha$  radiation. Raman spectra were obtained with an excitation line at 512 nm from an Ar laser (Renishaw Invia). The samples were analyzed by the nitrogen sorption technique using a Micromeritics ASAP 2020 instrument at 77 K, and their surface area was calculated by using the Brunauer-Emmett-Teller (BET) method in the relative pressure ( $P/P_0$ ) range of 0.002-0.3.

### **Reference:**

- 1 M.J. Hu, J.F. Gao, Y.C. Dong, K. Li, G.C. Shan, S.L. Yang and R.K.Y. Li, *Langmuir*, 2012, **28**, 7101.
- 2 D. Li, M.B. Muller, S. Gilje, R.B. Kaner and G.G. Wallace, *Nat. Nanotechnol.*, 2008, **3**, 101.

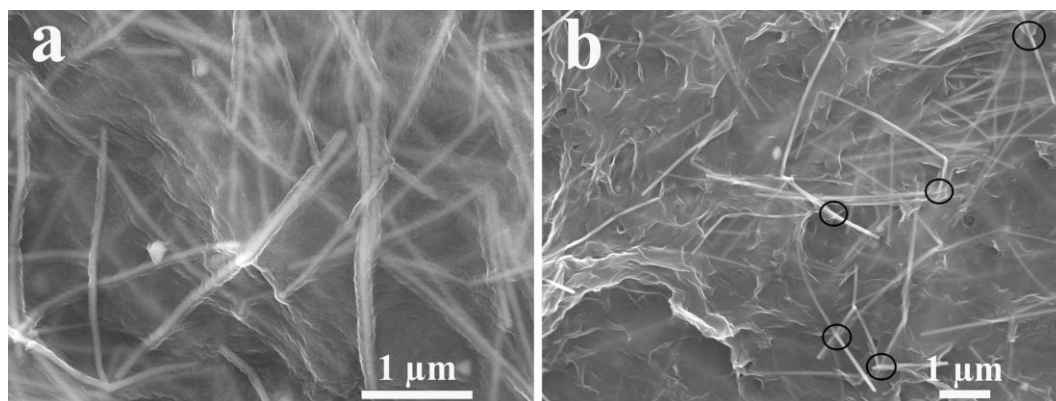

**Figure S1** The high-magnification SEM images of N-doped graphene/silver nanowires composite (a) silver nanowires embedded in N-doped graphene (b) silver nanowires stretched out from the edges of N-doped graphene sheets indicated by the circles.

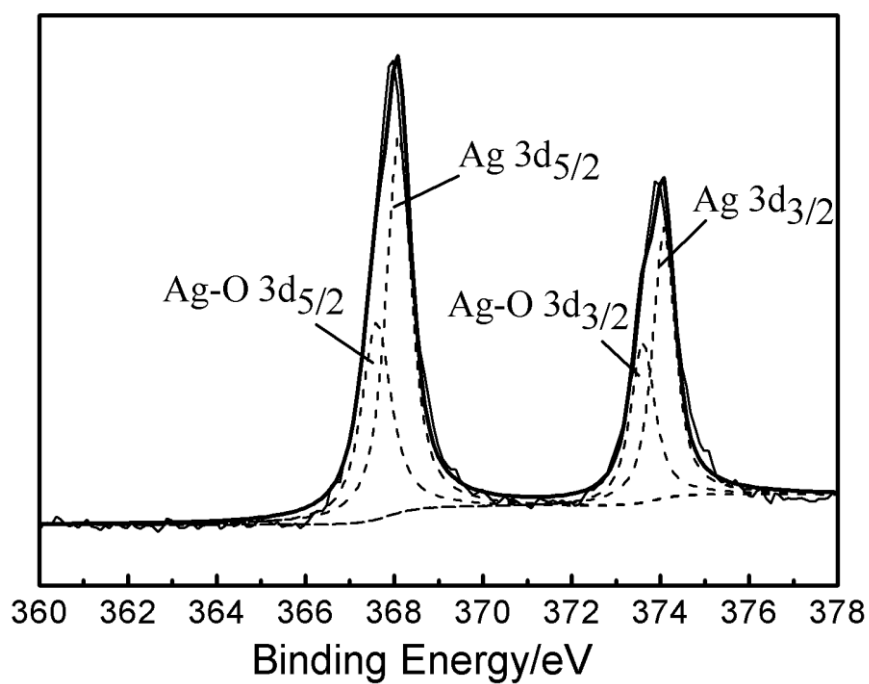

**Figure S2** High resolution XPS spectra of Ag 3d peak of N-doped graphene/silver nanowires composite.

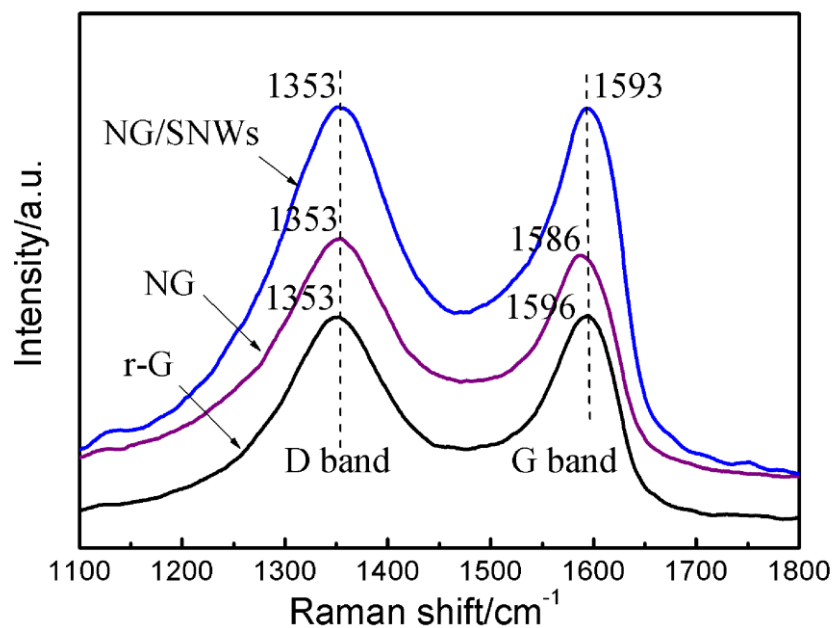

**Figure S3** Raman spectra for reduced graphene (r-G), N-doped graphene (NG) and N-doped graphene/silver nanowires (NG/SNWs) composite.

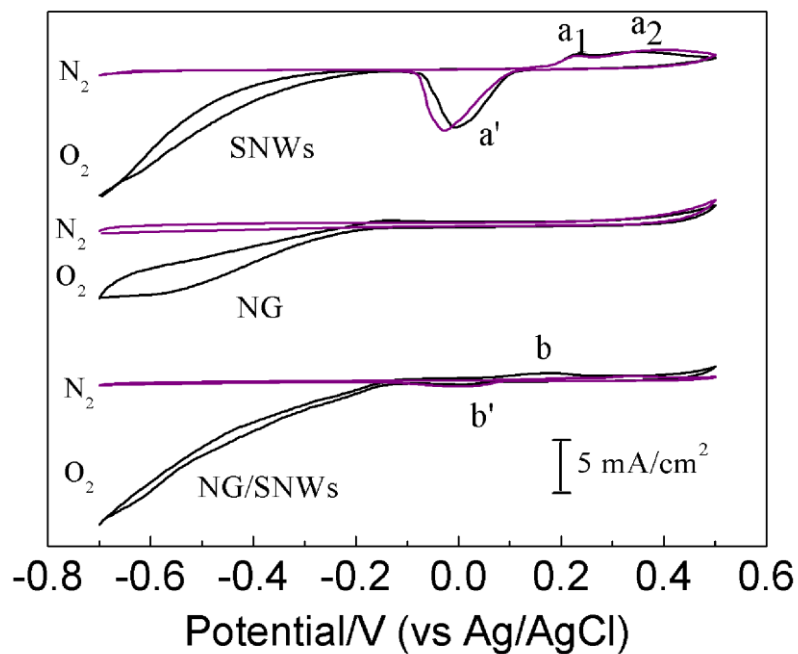

**Figure S4** CVs of silver nanowires (SNWs), N-doped graphene (NG) and N-doped graphene/silver nanowires (NG/SNWs) in 1 M KOH solution by O<sub>2</sub> bubbling (black line) or N<sub>2</sub> bubbling (violet line).
